# Supplementary material for: Promotion of Knowledge and Trust Surrounding Scarce Resource Allocation Policies: A Randomized Clinical Trial
Source: PubMed Central journal article supplement (PMC11489882; doi:10.1001/jamahealthforum.2024.3509), 2024-10-18
Supplement: jamahealthforum-e243509-s002.pdf [file jamahealthforum-e243509-s002.pdf]

## Supplemental Online Content

Buhr RG, Romero R, Wisk LE. Promotion of knowledge and trust surrounding scare resource allocation policies: a randomized clinical trial. *JAMA Health Forum*. 2024;5(10):e243509. doi:10.1001/jamahealthforum.2024.3509

**eFigure 1.** Distribution of timing of survey responses

**eFigure 2.** Days between survey administrations

**eFigure 3.** Marginal estimates of percentage of correct responses to knowledge items by randomization group and time point by domain

**eTable 1.** Questions from SRA survey with sampling universe

**eTable 2.** Individual item mean scores by treatment group and time

**eTable 3.** Marginal estimates for correct knowledge responses (main analysis)

**eTable 4.** Marginal estimates for % correct knowledge responses (main analysis)

**eTable 5.** Marginal estimates for trust and anxiety items (main analysis)

**eTable 6.** Marginal estimates for correct knowledge responses by self-reported health care professional status (sensitivity analysis)

**eTable 7.** Marginal estimates for trust and anxiety items by self-reported health care professional status (sensitivity analysis)

**eTable 8.** Overall knowledge improvement treatment effect – stratified analyses by demographics

**eTable 9.** Trust and anxiety item treatment effect – stratified analyses by demographics

**eTable 10.** Comparison of imputed and unimputed datasets on outcomes

This supplemental material has been provided by the authors to give readers additional information about their work.

eFigures:

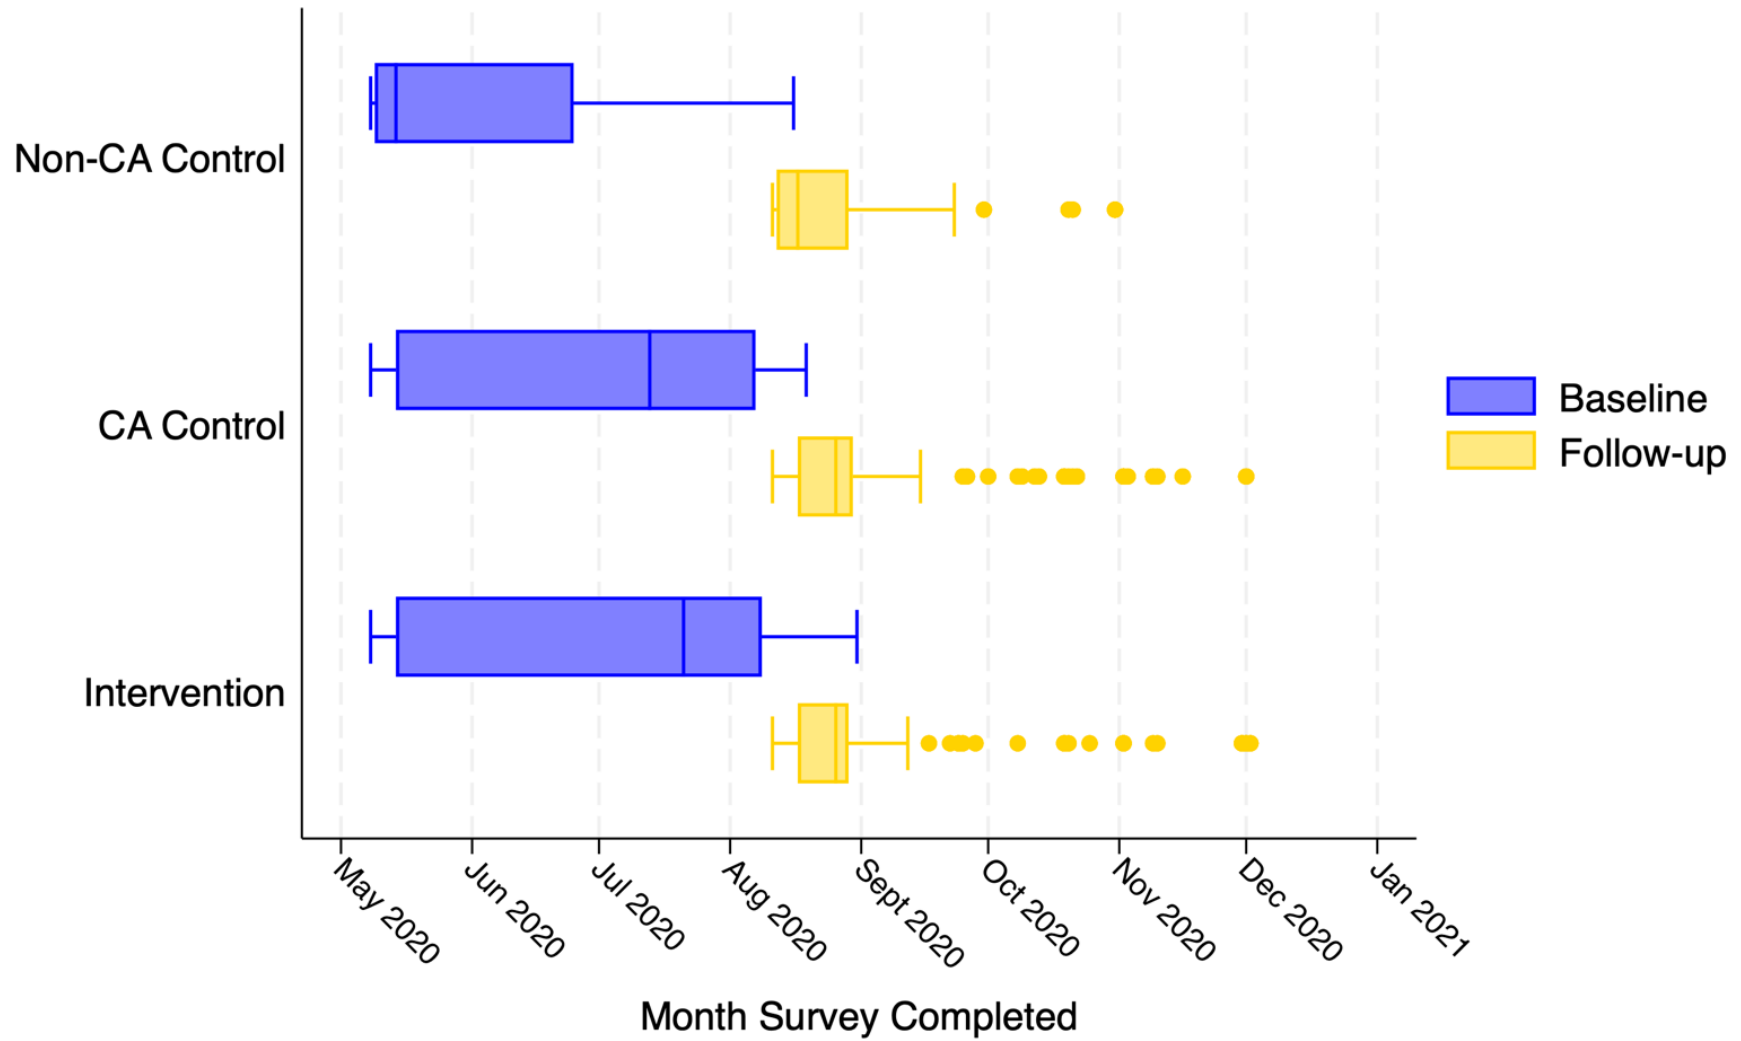

eFigure 1: Distribution of timing of survey responses

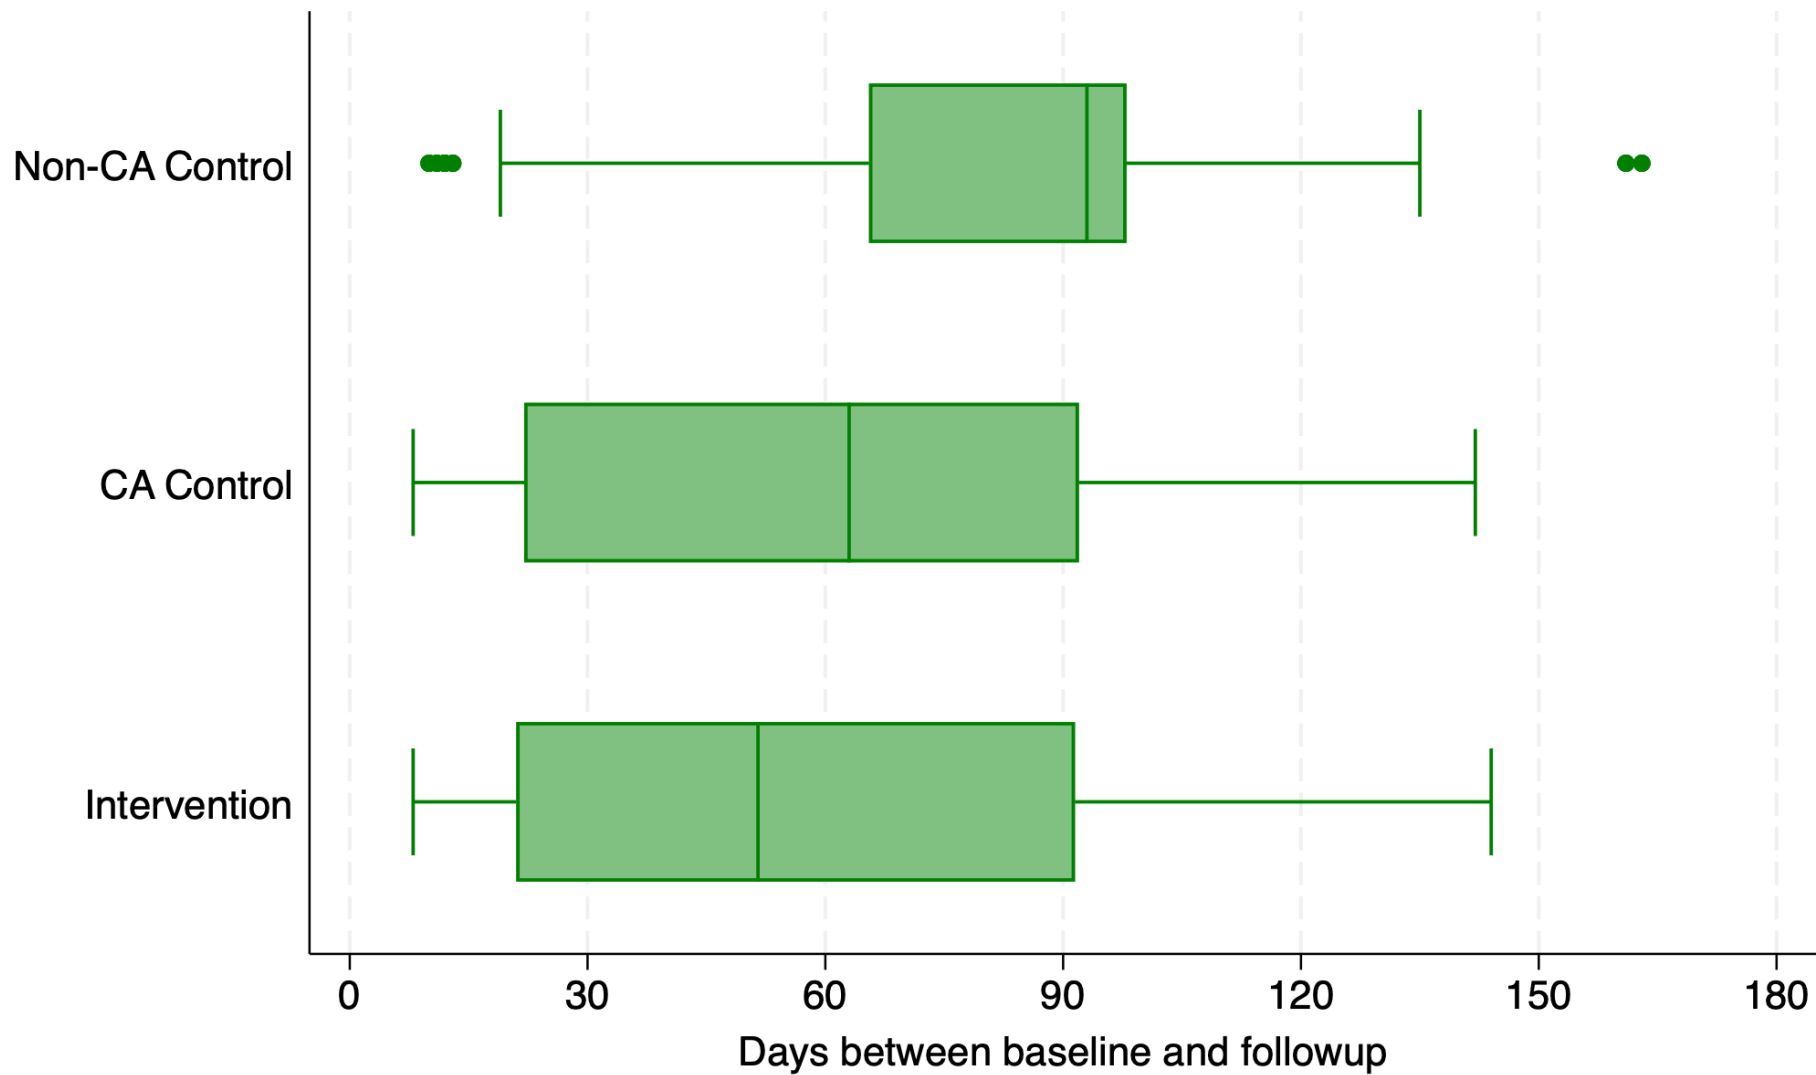

eFigure 2: Days between survey administrations

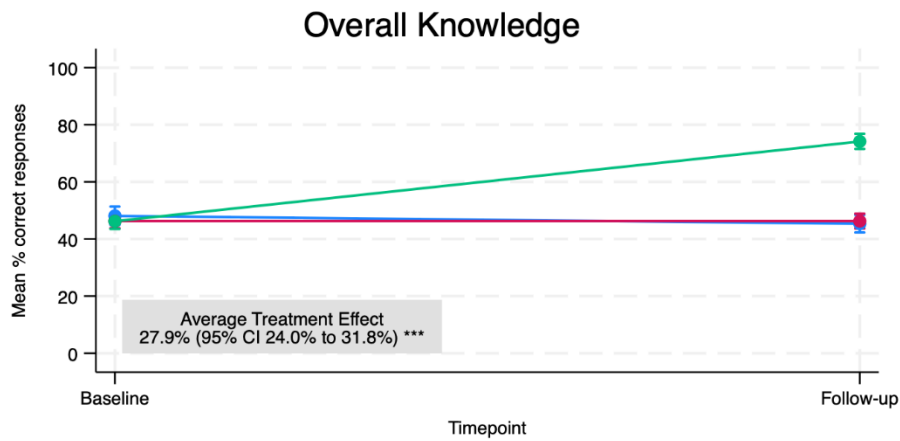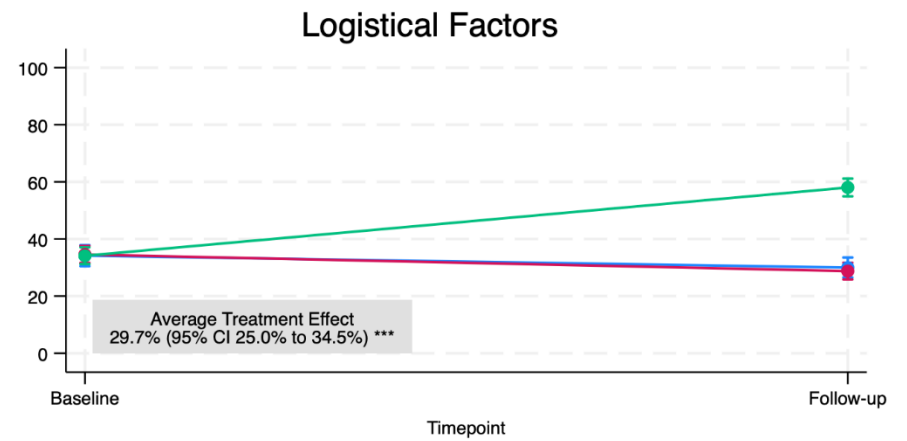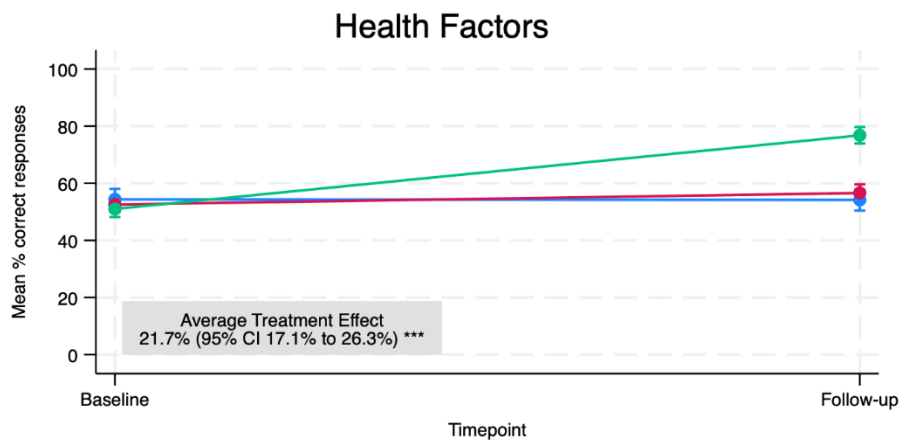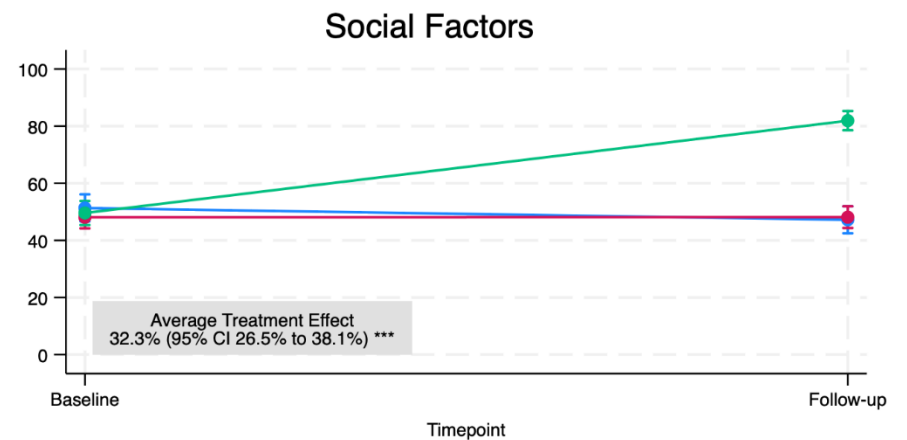

— Non-CA Control    — CA Control    — Intervention

eFigure 3: Marginal estimates of percentage of correct responses to knowledge items by randomization group and timepoint by domain. Point estimate of group mean with 95% confidence interval. Text boxes show difference in differences between intervention and control (average treatment effect) with confidence interval. \* =  $P < 0.05$ , \*\* =  $P < 0.01$ , \*\*\* =  $P < 0.001$

## Supplemental eTables:

eTable 1: Questions from SRA survey with sampling universe

| Section Introductory Header                              |                                                                                                                                                                                                                                                                                                                                                                                                                                                                                                                                                                                                                                                                                                                                                                                                                                                                                                                                          |                                               |                                                |
|----------------------------------------------------------|------------------------------------------------------------------------------------------------------------------------------------------------------------------------------------------------------------------------------------------------------------------------------------------------------------------------------------------------------------------------------------------------------------------------------------------------------------------------------------------------------------------------------------------------------------------------------------------------------------------------------------------------------------------------------------------------------------------------------------------------------------------------------------------------------------------------------------------------------------------------------------------------------------------------------------------|-----------------------------------------------|------------------------------------------------|
| Universe                                                 | Header Text                                                                                                                                                                                                                                                                                                                                                                                                                                                                                                                                                                                                                                                                                                                                                                                                                                                                                                                              |                                               |                                                |
| HCP Header                                               | <p><b>COVID and Crisis Situations.</b><br/>           Additionally, we are interested in learning more about what you know and how you feel about the ways hospitals are preparing for surges in the number of patients coming to hospitals.</p> <p>One aspect in particular we would like to ask you about is how hospitals and doctors would decide who would get critical care resources (mainly mechanical ventilators, but also other things that may be in scarce supply like dialysis or ECMO machines, supplies and medications, and staff needed for ICU care) if there weren't enough for everyone who needed one during a crisis.</p> <p>The situations described would ONLY apply in situations that were so bad that the hospital or health care workers could not possibly uphold the usual standards of care, and did not have enough life-saving supplies, equipment, or staff to care for everyone who needed help.</p> |                                               |                                                |
| Non-HCP Header                                           | <p><b>COVID and Crisis Situations.</b><br/>           Additionally, we are interested in learning more about what you know and how you feel about the ways hospitals are preparing for surges in the number of patients coming to hospitals.</p> <p>One aspect in particular we would like to ask you about is how hospitals and doctors would decide who would get life support machines (for example, mechanical ventilators or respirators, critical medications and supplies, or staff needed to operate an ICU) if there weren't enough for everyone who needed one during a crisis.</p> <p>The situations described would ONLY apply in situations that were so bad that the hospital or health care workers could not possibly uphold the usual standards of care, and did not have enough life-saving supplies, equipment, or staff to care for everyone who needed help.”</p>                                                   |                                               |                                                |
| Section 1: Knowledge surrounding logistics of SRA policy |                                                                                                                                                                                                                                                                                                                                                                                                                                                                                                                                                                                                                                                                                                                                                                                                                                                                                                                                          |                                               |                                                |
| Section Scaling                                          | 1: This if false, 2: I'm not sure, 3: This is true                                                                                                                                                                                                                                                                                                                                                                                                                                                                                                                                                                                                                                                                                                                                                                                                                                                                                       |                                               |                                                |
| Universe                                                 | Question Prompt Text                                                                                                                                                                                                                                                                                                                                                                                                                                                                                                                                                                                                                                                                                                                                                                                                                                                                                                                     | Proportion not answered baseline <sup>1</sup> | Proportion not answered follow-up <sup>1</sup> |
| HCP Header                                               | <p><i>How accurate do you think the following statements are about how hospitals and health care workers may make decisions in general about who would get critical care resources (such as life support/mechanical ventilators) during a crisis like a disaster or pandemic?</i></p> <p><i>This would be a crisis so catastrophic that providing usual or standard levels of care to all patients is no longer possible, and there aren't enough critical care resources (such as ventilators, dialysis machines, ECMO circuits, other supplies, medications, or staff) to care for everyone who needs these resources, and some people will die without these resources.</i></p>                                                                                                                                                                                                                                                       | ---                                           | ---                                            |
| Non-HCP Header                                           | <p><i>How accurate do you think the following statements are about how hospitals and health care workers may make decisions in general about who would get life support (such as a ventilator/respirator, also called a breathing machine) during a crisis like a disaster or pandemic?</i></p> <p><i>This would be a crisis so catastrophic that providing usual or standard levels of care to all patients is no longer possible, and there aren't enough critical care resources (such as life support machines, supplies, medications, or staff) to care for everyone who needs these resources, and some people might die without these resources.</i></p>                                                                                                                                                                                                                                                                          | ---                                           | ---                                            |

|                                                                                      |                                                                                                                                                                                                                                                                                                                                                                                                                                                                                                                                                                                                                                                                           |                                         |                                          |
|--------------------------------------------------------------------------------------|---------------------------------------------------------------------------------------------------------------------------------------------------------------------------------------------------------------------------------------------------------------------------------------------------------------------------------------------------------------------------------------------------------------------------------------------------------------------------------------------------------------------------------------------------------------------------------------------------------------------------------------------------------------------------|-----------------------------------------|------------------------------------------|
| ALL                                                                                  | Individual doctors will make decisions on a case-by-case basis                                                                                                                                                                                                                                                                                                                                                                                                                                                                                                                                                                                                            | 0%                                      | 0%                                       |
| ALL                                                                                  | Hospital committees will make decisions on a case-by-case basis                                                                                                                                                                                                                                                                                                                                                                                                                                                                                                                                                                                                           | 0%                                      | 0%                                       |
| ALL                                                                                  | Hospital committees will make decisions by applying the same set of rules to everyone                                                                                                                                                                                                                                                                                                                                                                                                                                                                                                                                                                                     | 0%                                      | 0%                                       |
| ALL                                                                                  | Some patients may be taken off of life support in order to provide it to other patients who are more likely to survive                                                                                                                                                                                                                                                                                                                                                                                                                                                                                                                                                    | 0%                                      | 0%                                       |
| ALL                                                                                  | The same rules should apply to all patients even if they were admitted to the hospital before the crisis started                                                                                                                                                                                                                                                                                                                                                                                                                                                                                                                                                          | 0%                                      | 0%                                       |
| <b>Section 2: Knowledge surrounding use of health factors on resource allocation</b> |                                                                                                                                                                                                                                                                                                                                                                                                                                                                                                                                                                                                                                                                           |                                         |                                          |
| <b>Section Scaling</b>                                                               | 1: Would be <u>less</u> likely to get life support, 2: Would not influence decisions about life support, 3: Would be <u>more</u> likely to get life support, 4: I don't know/I'm not sure                                                                                                                                                                                                                                                                                                                                                                                                                                                                                 |                                         |                                          |
| <b>Universe</b>                                                                      | <b>Question Prompt Text</b>                                                                                                                                                                                                                                                                                                                                                                                                                                                                                                                                                                                                                                               | <b>Proportion not answered baseline</b> | <b>Proportion not answered follow-up</b> |
| <b>HCP Header</b>                                                                    | <p><i>How accurate do you think the following statements are about how healthcare workers and hospitals will use health factors to decide who gets critical care resources (like mechanical ventilators) during a crisis like a disaster or pandemic?</i></p> <p><i>As a reminder, this would be a crisis so catastrophic that providing usual or standard levels of care to all patients is no longer possible, and there aren't enough critical care resources (such as ventilators, dialysis machines, ECMO circuits, other supplies, medications, or staff) to care for everyone who needs these resources, and some people will die without these resources.</i></p> | ---                                     | ---                                      |
| <b>Non-HCP Header</b>                                                                | <p><i>How accurate do you think the following statements are about how hospitals and health care workers may make decisions in general about who would get life support (such as a ventilator/respirator, also called a breathing machine) during a crisis like a disaster or pandemic?</i></p> <p><i>This would be a crisis so catastrophic that providing usual or standard levels of care to all patients is no longer possible, and there aren't enough critical care resources (such as life support machines, supplies, medications, or staff) to care for everyone who needs these resources, and some people might die without these resources.</i></p>           | ---                                     | ---                                      |
| ALL                                                                                  | Patients with coronavirus (COVID-19)                                                                                                                                                                                                                                                                                                                                                                                                                                                                                                                                                                                                                                      | 0.26%                                   | 0.13%                                    |
| ALL                                                                                  | Patients who are pregnant                                                                                                                                                                                                                                                                                                                                                                                                                                                                                                                                                                                                                                                 | 0.26%                                   | 0.13%                                    |
| ALL                                                                                  | Patients with severe chronic illnesses (for example: advanced heart failure or cancer) that limit their life span                                                                                                                                                                                                                                                                                                                                                                                                                                                                                                                                                         | 0.26%                                   | 0.13%                                    |
| ALL                                                                                  | Patients who are deemed less likely to survive and make it out of the hospital alive                                                                                                                                                                                                                                                                                                                                                                                                                                                                                                                                                                                      | 0.26%                                   | 0.13%                                    |
| ALL                                                                                  | Patients who are elderly                                                                                                                                                                                                                                                                                                                                                                                                                                                                                                                                                                                                                                                  | 0.26%                                   | 0.13%                                    |
| ALL                                                                                  | Patients with physical disabilities (for example: being blind or using a wheelchair)                                                                                                                                                                                                                                                                                                                                                                                                                                                                                                                                                                                      | 0.26%                                   | 0.13%                                    |
| ALL                                                                                  | Patients with cognitive or intellectual disabilities (for example: autism or developmental delay)                                                                                                                                                                                                                                                                                                                                                                                                                                                                                                                                                                         | 0.26%                                   | 0.13%                                    |
| <b>Section 3: Knowledge surrounding use of health factors on resource allocation</b> |                                                                                                                                                                                                                                                                                                                                                                                                                                                                                                                                                                                                                                                                           |                                         |                                          |
| <b>Section Scaling</b>                                                               | 1: Would be <u>less</u> likely to get life support, 2: Would not influence decisions about life support, 3: Would be <u>more</u> likely to get life support, 4: I don't know/I'm not sure                                                                                                                                                                                                                                                                                                                                                                                                                                                                                 |                                         |                                          |
| <b>Universe</b>                                                                      | <b>Question Prompt Text</b>                                                                                                                                                                                                                                                                                                                                                                                                                                                                                                                                                                                                                                               | <b>Proportion not answered baseline</b> | <b>Proportion not answered follow-up</b> |

|                                                                                           |                                                                                                                                                                                                                                                                                                                                                                                                                                                                                                                                                                                                                                          |                                         |                                          |
|-------------------------------------------------------------------------------------------|------------------------------------------------------------------------------------------------------------------------------------------------------------------------------------------------------------------------------------------------------------------------------------------------------------------------------------------------------------------------------------------------------------------------------------------------------------------------------------------------------------------------------------------------------------------------------------------------------------------------------------------|-----------------------------------------|------------------------------------------|
| <b>HCP Header</b>                                                                         | <p><i>Please tell us what you know about how hospitals or healthcare workers will use non-health-related factors to decide if certain groups of people get life support during a crisis like a disaster or pandemic?</i></p> <p><i>As a reminder, this would be a crisis so catastrophic that providing usual or standard levels of care to all patients is no longer possible, and there aren't enough critical care resources (such as ventilators, dialysis machines, ECMO circuits, other supplies, medications, or staff) to care for everyone who needs these resources, and some people will die without these resources.</i></p> | ---                                     | ---                                      |
| <b>Non-HCP Header</b>                                                                     | <p><i>Please tell us what you know about how hospitals or healthcare workers will use non-health-related factors to decide if certain groups of people get life support during a crisis like a disaster or pandemic?</i></p> <p><i>Once again, this would be a crisis so catastrophic that providing usual or standard levels of care to all patients is no longer possible, and there aren't enough critical care resources (such as life support machines, supplies, medications, or staff) to care for everyone who needs these resources, and some people might die without these resources.</i></p>                                 | ---                                     | ---                                      |
| ALL                                                                                       | People who are health care workers                                                                                                                                                                                                                                                                                                                                                                                                                                                                                                                                                                                                       | 0.78%                                   | 0.26%                                    |
| ALL                                                                                       | People who are wealthy, famous, or in positions of power (for example: celebrities or politicians)                                                                                                                                                                                                                                                                                                                                                                                                                                                                                                                                       | 0.78%                                   | 0.26%                                    |
| ALL                                                                                       | People who are a racial or ethnic minority                                                                                                                                                                                                                                                                                                                                                                                                                                                                                                                                                                                               | 0.78%                                   | 0.26%                                    |
| ALL                                                                                       | People who are LGBTQ+ (e.g., lesbian, gay, bisexual, or transgender)                                                                                                                                                                                                                                                                                                                                                                                                                                                                                                                                                                     | 0.78%                                   | 0.26%                                    |
| ALL                                                                                       | People who are prisoners                                                                                                                                                                                                                                                                                                                                                                                                                                                                                                                                                                                                                 | 0.78%                                   | 0.26%                                    |
| ALL                                                                                       | People without health insurance                                                                                                                                                                                                                                                                                                                                                                                                                                                                                                                                                                                                          | 0.78%                                   | 0.26%                                    |
| ALL                                                                                       | People who are undocumented immigrants                                                                                                                                                                                                                                                                                                                                                                                                                                                                                                                                                                                                   | 0.78%                                   | 0.26%                                    |
| ALL                                                                                       | People who do not speak English                                                                                                                                                                                                                                                                                                                                                                                                                                                                                                                                                                                                          | 0.78%                                   | 0.26%                                    |
| <b>Section 4: Trust surrounding social or non-health factors considered in SRA policy</b> |                                                                                                                                                                                                                                                                                                                                                                                                                                                                                                                                                                                                                                          |                                         |                                          |
| <b>Section Scaling</b>                                                                    | 10-point Likert: <b>I strongly disagree with this (1) to (10) I strongly agree with this.</b> <u>or</u> I'd prefer not to answer                                                                                                                                                                                                                                                                                                                                                                                                                                                                                                         |                                         |                                          |
| <b>Universe</b>                                                                           | <b>Question Prompt Text</b>                                                                                                                                                                                                                                                                                                                                                                                                                                                                                                                                                                                                              | <b>Proportion not answered baseline</b> | <b>Proportion not answered follow-up</b> |
| ALL Header                                                                                | <i>Please tell us a little more about how strongly you agree or disagree with the following statements about how policies like this would be applied, and how you feel about them in general.</i>                                                                                                                                                                                                                                                                                                                                                                                                                                        | ---                                     | ---                                      |
| ALL                                                                                       | I trust that hospitals and doctors will apply policies like this in a fair and consistent way                                                                                                                                                                                                                                                                                                                                                                                                                                                                                                                                            | 4.42%                                   | 2.73%                                    |
| ALL                                                                                       | I trust hospitals and doctors to be honest and transparent about how resources are used in a crisis                                                                                                                                                                                                                                                                                                                                                                                                                                                                                                                                      | 4.68%                                   | 2.60%                                    |
| ALL                                                                                       | I feel anxious or worried when I think about policies like these                                                                                                                                                                                                                                                                                                                                                                                                                                                                                                                                                                         | 4.16%                                   | 2.21%                                    |
| HCP Only                                                                                  | I feel like I would be distressed or uncomfortable if I had to carry out policies like these                                                                                                                                                                                                                                                                                                                                                                                                                                                                                                                                             | 9.65%                                   | 2.19%                                    |
| HCP Only                                                                                  | I would have a moral objection to carrying out a policy like this                                                                                                                                                                                                                                                                                                                                                                                                                                                                                                                                                                        | 13.16%                                  | 4.39%                                    |
| <b>Section 5: Feedback on Intervention (Intervention Group Only)</b>                      |                                                                                                                                                                                                                                                                                                                                                                                                                                                                                                                                                                                                                                          |                                         |                                          |
| <b>Section Scaling</b>                                                                    | 10-point Likert: <b>I strongly disagree with this (1) to (10) I strongly agree with this,</b> <u>or</u> I'd prefer not to answer                                                                                                                                                                                                                                                                                                                                                                                                                                                                                                         |                                         |                                          |
| <b>Universe</b>                                                                           | <b>Question Prompt Text</b>                                                                                                                                                                                                                                                                                                                                                                                                                                                                                                                                                                                                              | <b>Proportion not answered baseline</b> | <b>Proportion not answered follow-up</b> |

|            |                                                                       |     |       |
|------------|-----------------------------------------------------------------------|-----|-------|
| ALL Header | <i>Please tell us your opinions about the video you just watched.</i> | --- | ---   |
| ALL        | This video explained things in a way that was easy to understand.     | N/A | 1.09% |
| ALL        | This video clarified how resource allocation policies work.           | N/A | 1.09% |
| ALL        | This video increased my anxiety about resource allocation policies.   | N/A | 1.09% |
| ALL        | This video raised new or unanswered questions about these policies.   | N/A | 1.09% |

1. Among N=770 respondents included in the analytic sample



eTable 2: Individual item mean scores by treatment group and time

| Item                                                                                                                   | Baseline    |               | Follow-up   |               | Difference-in-Differences |         |
|------------------------------------------------------------------------------------------------------------------------|-------------|---------------|-------------|---------------|---------------------------|---------|
|                                                                                                                        | Control Arm | Treatment Arm | Control Arm | Treatment Arm | Tx Effect                 |         |
| <b>Knowledge - Logistics</b>                                                                                           | % Correct   |               | % Correct   |               | $\Delta$ % Correct        | P-value |
| Individual doctors will make decisions on a case-by-case basis                                                         | 24.2%       | 24.3%         | 17.5%       | 63.8%         | 46.1%                     | <.001   |
| Hospital committees will make decisions on a case-by-case basis                                                        | 16.2%       | 14.1%         | 14.6%       | 22.8%         | 10.4%                     | 0.02    |
| Hospital committees will make decisions by applying the same set of rules to everyone                                  | 38.1%       | 39.5%         | 34.8%       | 75.4%         | 39.2%                     | <.001   |
| Some patients may be taken off of life support in order to provide it to other patients who are more likely to survive | 49.0%       | 48.2%         | 37.1%       | 71.0%         | 34.7%                     | <.001   |
| The same rules should apply to all patients even if they were admitted to the hospital before the crisis started       | 45.4%       | 44.6%         | 39.7%       | 57.2%         | 18.3%                     | <.001   |
| <b>Knowledge - Health Factors</b>                                                                                      |             |               |             |               |                           |         |
| Patients with coronavirus (COVID-19)                                                                                   | 27.5%       | 28.8%         | 41.1%       | 72.6%         | 30.2%                     | <.001   |
| Patients who are pregnant                                                                                              | 79.1%       | 72.3%         | 82.1%       | 86.9%         | 11.6%                     | 0.006   |
| Patients with severe chronic illnesses (for example: advanced heart failure or cancer) that limit their life span      | 63.6%       | 64.2%         | 52.6%       | 63.9%         | 10.6%                     | 0.03    |
| Patients who are deemed less likely to survive and make it out of the hospital alive                                   | 79.8%       | 79.6%         | 69.9%       | 85.0%         | 15.4%                     | <.001   |
| Patients who are elderly                                                                                               | 20.5%       | 19.3%         | 28.8%       | 69.0%         | 41.4%                     | <.001   |
| Patients with physical disabilities (for example: being blind or using a wheelchair)                                   | 40.1%       | 38.0%         | 60.3%       | 80.7%         | 22.5%                     | <.001   |
| Patients with cognitive or intellectual disabilities (for example: autism or developmental delay)                      | 57.3%       | 56.2%         | 61.6%       | 82.1%         | 21.6%                     | <.001   |
| <b>Knowledge - Social Factors</b>                                                                                      |             |               |             |               |                           |         |
| People who are health care workers                                                                                     | 51.5%       | 56.0%         | 59.2%       | 77.3%         | 13.6%                     | 0.001   |
| People who are wealthy, famous, or in positions of power (for example: celebrities or politicians)                     | 28.4%       | 33.0%         | 29.8%       | 78.0%         | 43.7%                     | <.001   |
| People who are a racial or ethnic minority                                                                             | 53.2%       | 54.6%         | 51.5%       | 84.2%         | 31.3%                     | <.001   |
| People who are LGBTQ+ (e.g., lesbian, gay, bisexual, or transgender)                                                   | 64.9%       | 66.7%         | 63.9%       | 89.7%         | 24.1%                     | <.001   |
| People who are prisoners                                                                                               | 40.1%       | 40.7%         | 39.5%       | 80.6%         | 40.6%                     | <.001   |
| People without health insurance                                                                                        | 48.5%       | 48.7%         | 44.1%       | 81.7%         | 37.3%                     | <.001   |
| People who are undocumented immigrants                                                                                 | 46.2%       | 46.9%         | 42.8%       | 81.7%         | 38.1%                     | <.001   |
| People who do not speak English                                                                                        | 55.9%       | 54.6%         | 53.5%       | 84.6%         | 32.4%                     | <.001   |

eTable 3: Marginal estimates for correct knowledge responses (main analysis)

|                                       | Marginal Estimate (95% CI*) | Wald Z   |
|---------------------------------------|-----------------------------|----------|
|                                       | Number Correct Responses    | P-Value* |
| <b>Overall Knowledge (out of 20)</b>  |                             |          |
| Baseline, Non-CA Control              | 9.6 (8.7, 10.5)             | <.001    |
| Baseline, CA Control                  | 9.3 (8.6, 9.9)              | <.001    |
| Baseline, Intervention                | 9.2 (8.5, 10.0)             | <.001    |
| Follow-up, Non-CA Control             | 9.1 (8.2, 9.9)              | <.001    |
| Follow-up, CA Control                 | 9.3 (8.6, 9.9)              | <.001    |
| Follow-up, Intervention               | 14.8 (13.8, 15.9)           | <.001    |
| <i>Average Treatment Effect (DID)</i> | 5.6 (4.8, 6.4)              | <.001    |
| <b>Logistical Factors (out of 5)</b>  |                             |          |
| Baseline, Non-CA Control              | 1.7 (1.4, 2.0)              | <.001    |
| Baseline, CA Control                  | 1.7 (1.5, 1.9)              | <.001    |
| Baseline, Intervention                | 1.7 (1.5, 1.9)              | <.001    |
| Follow-up, Non-CA Control             | 1.5 (1.3, 1.7)              | <.001    |
| Follow-up, CA Control                 | 1.4 (1.2, 1.6)              | <.001    |
| Follow-up, Intervention               | 2.9 (2.6, 3.2)              | <.001    |
| <i>Average Treatment Effect (DID)</i> | 1.5 (1.2, 1.8)              | <.001    |
| <b>Health Factors (out of 7)</b>      |                             |          |
| Baseline, Non-CA Control              | 3.8 (3.4, 4.2)              | <.001    |
| Baseline, CA Control                  | 3.7 (3.4, 4.0)              | <.001    |
| Baseline, Intervention                | 3.6 (3.3, 3.9)              | <.001    |
| Follow-up, Non-CA Control             | 3.8 (3.4, 4.2)              | <.001    |
| Follow-up, CA Control                 | 4.0 (3.7, 4.3)              | <.001    |
| Follow-up, Intervention               | 5.4 (5.0, 5.7)              | <.001    |
| <i>Average Treatment Effect (DID)</i> | 1.5 (1.0, 2.0)              | <.001    |
| <b>Social Factors (out of 8)</b>      |                             |          |
| Baseline, Non-CA Control              | 4.1 (3.6, 4.7)              | <.001    |
| Baseline, CA Control                  | 3.8 (3.4, 4.3)              | <.001    |
| Baseline, Intervention                | 4.0 (3.5, 4.4)              | <.001    |
| Follow-up, Non-CA Control             | 3.8 (3.3, 4.3)              | <.001    |
| Follow-up, CA Control                 | 3.9 (3.4, 4.3)              | <.001    |
| Follow-up, Intervention               | 6.6 (5.9, 7.2)              | <.001    |
| <i>Average Treatment Effect (DID)</i> | 2.6 (2.1, 3.1)              | <.001    |

\* Bonferroni corrected for multiple comparisons

eTable 4: Marginal estimates for % correct knowledge responses (main analysis)

|                                       | <b>Marginal Estimate (95% CI*)</b><br>Percent of Correct Responses | <b>Wald Z</b><br>P-Value* |
|---------------------------------------|--------------------------------------------------------------------|---------------------------|
| <b>Overall Knowledge</b>              |                                                                    |                           |
| Baseline, Non-CA Control              | 48.1% (43.8%, 52.5%)                                               | <.001                     |
| Baseline, CA Control                  | 46.3% (42.9%, 49.6%)                                               | <.001                     |
| Baseline, Intervention                | 46.2% (42.6%, 49.9%)                                               | <.001                     |
| Follow-up, Non-CA Control             | 45.3% (41.2%, 49.5%)                                               | <.001                     |
| Follow-up, CA Control                 | 46.3% (42.8%, 49.7%)                                               | <.001                     |
| Follow-up, Intervention               | 74.2% (70.6%, 77.7%)                                               | <.001                     |
| <i>Average Treatment Effect (DID)</i> | 28.0% (24.0%, 31.9%)                                               | <.001                     |
| <b>Logistical Factors</b>             |                                                                    |                           |
| Baseline, Non-CA Control              | 34.2% (29.2%, 39.1%)                                               | <.001                     |
| Baseline, CA Control                  | 34.6% (30.6%, 38.6%)                                               | <.001                     |
| Baseline, Intervention                | 34.1% (30.2%, 38.1%)                                               | <.001                     |
| Follow-up, Non-CA Control             | 30.0% (25.3%, 34.7%)                                               | <.001                     |
| Follow-up, CA Control                 | 28.7% (24.8%, 32.7%)                                               | <.001                     |
| Follow-up, Intervention               | 58.0% (53.9%, 62.2%)                                               | <.001                     |
| <i>Average Treatment Effect (DID)</i> | 29.7% (25.0%, 34.5%)                                               | <.001                     |
| <b>Health Factors</b>                 |                                                                    |                           |
| Baseline, Non-CA Control              | 54.4% (49.5%, 59.3%)                                               | <.001                     |
| Baseline, CA Control                  | 52.6% (48.9%, 56.2%)                                               | <.001                     |
| Baseline, Intervention                | 51.0% (47.2%, 54.9%)                                               | <.001                     |
| Follow-up, Non-CA Control             | 54.2% (49.2%, 59.2%)                                               | <.001                     |
| Follow-up, CA Control                 | 56.6% (52.6%, 60.7%)                                               | <.001                     |
| Follow-up, Intervention               | 76.8% (73.0%, 80.7%)                                               | <.001                     |
| <i>Average Treatment Effect (DID)</i> | 21.7% (17.1%, 26.3%)                                               | <.001                     |
| <b>Social Factors</b>                 |                                                                    |                           |
| Baseline, Non-CA Control              | 51.4% (45.0%, 57.7%)                                               | <.001                     |
| Baseline, CA Control                  | 48.1% (42.8%, 53.3%)                                               | <.001                     |
| Baseline, Intervention                | 49.6% (43.9%, 55.2%)                                               | <.001                     |
| Follow-up, Non-CA Control             | 47.2% (40.9%, 53.5%)                                               | <.001                     |
| Follow-up, CA Control                 | 48.1% (43.0%, 53.2%)                                               | <.001                     |
| Follow-up, Intervention               | 81.9% (77.4%, 86.5%)                                               | <.001                     |
| <i>Average Treatment Effect (DID)</i> | 32.3% (26.5%, 38.1%)                                               | <.001                     |

\* Bonferroni corrected for multiple comparisons

eTable 5: Marginal estimates for trust and anxiety items (main analysis)

|                                                                                                              | Marginal Estimate (95% CI*)<br>Likert Score                          | Wald Z<br>P-Value* |
|--------------------------------------------------------------------------------------------------------------|----------------------------------------------------------------------|--------------------|
| <b>"I trust that hospitals and doctors will apply policies like this in a fair and consistent way"</b>       | <b>Likert Scale<br/>(1: Strongly Disagree to 10: Strongly Agree)</b> |                    |
| Baseline, Non-CA Control                                                                                     | 6.1 (5.6, 6.6)                                                       | <.001              |
| Baseline, CA Control                                                                                         | 6.2 (5.8, 6.6)                                                       | <.001              |
| Baseline, Intervention                                                                                       | 6.1 (5.7, 6.5)                                                       | <.001              |
| Follow-up, Non-CA Control                                                                                    | 5.9 (5.4, 6.4)                                                       | <.001              |
| Follow-up, CA Control                                                                                        | 6.0 (5.6, 6.4)                                                       | <.001              |
| Follow-up, Intervention                                                                                      | 6.5 (6.1, 6.9)                                                       | <.001              |
| <i>Average Treatment Effect (DID)</i>                                                                        | 0.5 (0.1, 0.9)                                                       | <.001              |
| <b>"I trust hospitals and doctors to be honest and transparent about how resources are used in a crisis"</b> | <b>Likert Scale<br/>(1: Strongly Disagree to 10: Strongly Agree)</b> |                    |
| Baseline, Non-CA Control                                                                                     | 6.0 (5.5, 6.6)                                                       | <.001              |
| Baseline, CA Control                                                                                         | 6.1 (5.7, 6.6)                                                       | <.001              |
| Baseline, Intervention                                                                                       | 6.2 (5.7, 6.6)                                                       | <.001              |
| Follow-up, Non-CA Control                                                                                    | 5.6 (5.1, 6.1)                                                       | <.001              |
| Follow-up, CA Control                                                                                        | 5.7 (5.3, 6.1)                                                       | <.001              |
| Follow-up, Intervention                                                                                      | 6.4 (6.0, 6.9)                                                       | <.001              |
| <i>Average Treatment Effect (DID)</i>                                                                        | 0.7 (0.3, 1.2)                                                       | 0.002              |
| <b>"I feel anxious or worried when I think about policies like these"</b>                                    | <b>Likert Scale<br/>(1: Strongly Disagree to 10: Strongly Agree)</b> |                    |
| Baseline, Non-CA Control                                                                                     | 6.3 (5.8, 6.9)                                                       | <.001              |
| Baseline, CA Control                                                                                         | 6.4 (6.0, 6.8)                                                       | <.001              |
| Baseline, Intervention                                                                                       | 6.3 (5.9, 6.8)                                                       | <.001              |
| Follow-up, Non-CA Control                                                                                    | 6.4 (5.8, 6.9)                                                       | <.001              |
| Follow-up, CA Control                                                                                        | 6.4 (6.0, 6.8)                                                       | <.001              |
| Follow-up, Intervention                                                                                      | 6.3 (5.9, 6.8)                                                       | <.001              |
| <i>Average Treatment Effect (DID)</i>                                                                        | 0.0 (-0.5, 0.4)                                                      | 0.85               |
| <b>"I feel like I would be distressed or uncomfortable if I had to carry out policies like these" ^</b>      | <b>Likert Scale<br/>(1: Strongly Disagree to 10: Strongly Agree)</b> |                    |
| Baseline, Non-CA Control                                                                                     | 6.9 (6.0, 7.8)                                                       | <.001              |
| Baseline, CA Control                                                                                         | 7.4 (6.6, 8.2)                                                       | <.001              |
| Baseline, Intervention                                                                                       | 7.4 (6.6, 8.2)                                                       | <.001              |
| Follow-up, Non-CA Control                                                                                    | 6.8 (5.9, 7.7)                                                       | <.001              |
| Follow-up, CA Control                                                                                        | 7.4 (6.7, 8.2)                                                       | <.001              |
| Follow-up, Intervention                                                                                      | 6.9 (6.1, 7.7)                                                       | <.001              |
| <i>Average Treatment Effect (DID)</i>                                                                        | -0.5 (-1.4, 0.4)                                                     | 0.31               |
| <b>"I would have a moral objection to carrying out a policy like this" ^</b>                                 | <b>Likert Scale<br/>(1: Strongly Disagree to 10: Strongly Agree)</b> |                    |
| Baseline, Non-CA Control                                                                                     | 4.9 (3.9, 5.9)                                                       | <.001              |
| Baseline, CA Control                                                                                         | 5.6 (4.7, 6.4)                                                       | <.001              |
| Baseline, Intervention                                                                                       | 4.8 (3.9, 5.7)                                                       | <.001              |
| Follow-up, Non-CA Control                                                                                    | 5.1 (4.1, 6.1)                                                       | <.001              |
| Follow-up, CA Control                                                                                        | 5.3 (4.5, 6.2)                                                       | <.001              |
| Follow-up, Intervention                                                                                      | 4.2 (3.3, 5.0)                                                       | <.001              |
| <i>Average Treatment Effect (DID)</i>                                                                        | -0.4 (-1.5, 0.7)                                                     | 0.51               |

\* Bonferroni corrected for multiple comparisons

^ Question only asked of self-identified health care professionals (n = 208)

eTable 6: Marginal estimates for correct knowledge responses by self-reported health care professional status (sensitivity analysis)

|                                                               | Marginal Estimate (95% CI*) | Wald Z   |
|---------------------------------------------------------------|-----------------------------|----------|
|                                                               | Number Correct Responses    | P-Value* |
| <b>Overall Knowledge</b>                                      |                             |          |
| Baseline, Layperson, Non-CA Control                           | 9.4 (8.3, 10.5)             | <.001    |
| Baseline, Layperson, CA Control                               | 8.8 (7.9, 9.6)              | <.001    |
| Baseline, Layperson, Intervention                             | 8.7 (7.8, 9.5)              | <.001    |
| Baseline, HCP, Non-CA Control                                 | 10.1 (8.4, 11.9)            | <.001    |
| Baseline, HCP, CA Control                                     | 10.4 (8.9, 11.9)            | <.001    |
| Baseline, HCP, Intervention                                   | 10.7 (9.1, 12.2)            | <.001    |
| Follow-up, Layperson, Non-CA Control                          | 9.1 (8.0, 10.1)             | <.001    |
| Follow-up, Layperson, CA Control                              | 8.8 (7.9, 9.6)              | <.001    |
| Follow-up, Layperson, Intervention                            | 14.7 (13.4, 16.1)           | <.001    |
| Follow-up, HCP, Non-CA Control                                | 9.1 (7.5, 10.7)             | <.001    |
| Follow-up, HCP, CA Control                                    | 10.4 (8.9, 11.9)            | <.001    |
| Follow-up, HCP, Intervention                                  | 15.1 (13.0, 17.2)           | <.001    |
| <i>Average Treatment Effect (DID): Laypersons</i>             | 6.1 (5.1, 7.0)              | <.001    |
| <i>Average Treatment Effect (DID): HCP</i>                    | 4.4 (2.9, 5.9)              | <.001    |
| <i>Moderated Avg. Treatment Effect (DDD): Net Lay vs. HCP</i> | 1.7 (-0.1, 3.4)             | 0.06     |
| <b>Logistical Factors Knowledge</b>                           |                             |          |
| Baseline, Layperson, Non-CA Control                           | 1.5 (1.2, 1.8)              | <.001    |
| Baseline, Layperson, CA Control                               | 1.7 (1.4, 1.9)              | <.001    |
| Baseline, Layperson, Intervention                             | 1.6 (1.3, 1.9)              | <.001    |
| Baseline, HCP, Non-CA Control                                 | 2.1 (1.5, 2.7)              | <.001    |
| Baseline, HCP, CA Control                                     | 1.9 (1.4, 2.3)              | <.001    |
| Baseline, HCP, Intervention                                   | 2.0 (1.5, 2.5)              | <.001    |
| Follow-up, Layperson, Non-CA Control                          | 1.3 (1.0, 1.6)              | <.001    |
| Follow-up, Layperson, CA Control                              | 1.4 (1.2, 1.6)              | <.001    |
| Follow-up, Layperson, Intervention                            | 2.9 (2.5, 3.3)              | <.001    |
| Follow-up, HCP, Non-CA Control                                | 1.9 (1.3, 2.4)              | <.001    |
| Follow-up, HCP, CA Control                                    | 1.5 (1.1, 1.9)              | <.001    |
| Follow-up, HCP, Intervention                                  | 2.8 (2.2, 3.4)              | <.001    |
| <i>Average Treatment Effect (DID): Laypersons</i>             | 1.6 (1.2, 2.0)              | <.001    |
| <i>Average Treatment Effect (DID): HCP</i>                    | 1.2 (0.6, 1.8)              | <.001    |
| <i>Moderated Avg. Treatment Effect (DDD): Net Lay vs. HCP</i> | 0.4 (-0.3, 1.2)             | 0.25     |
| <b>Health Factors Knowledge</b>                               |                             |          |
| Baseline, Layperson, Non-CA Control                           | 3.9 (3.4, 4.4)              | <.001    |
| Baseline, Layperson, CA Control                               | 3.5 (3.1, 3.9)              | <.001    |
| Baseline, Layperson, Intervention                             | 3.5 (3.1, 3.8)              | <.001    |
| Baseline, HCP, Non-CA Control                                 | 3.7 (3.0, 4.4)              | <.001    |
| Baseline, HCP, CA Control                                     | 4.1 (3.5, 4.8)              | <.001    |
| Baseline, HCP, Intervention                                   | 3.9 (3.2, 4.5)              | <.001    |
| Follow-up, Layperson, Non-CA Control                          | 3.9 (3.4, 4.4)              | <.001    |

|                                                               | <b>Marginal Estimate (95% CI*)</b> | <b>Wald Z</b>   |
|---------------------------------------------------------------|------------------------------------|-----------------|
|                                                               | <i>Number Correct Responses</i>    | <i>P-Value*</i> |
| Follow-up, Layperson, CA Control                              | 3.8 (3.4, 4.2)                     | <.001           |
| Follow-up, Layperson, Intervention                            | 5.3 (4.8, 5.8)                     | <.001           |
| Follow-up, HCP, Non-CA Control                                | 3.6 (2.9, 4.3)                     | <.001           |
| Follow-up, HCP, CA Control                                    | 4.3 (3.7, 5.0)                     | <.001           |
| Follow-up, HCP, Intervention                                  | 5.6 (4.8, 6.3)                     | <.001           |
| <i>Average Treatment Effect (DID): Laypersons</i>             | 1.5 (1.0, 2.1)                     | <.001           |
| <i>Average Treatment Effect (DID): HCP</i>                    | 1.5 (0.6, 2.4)                     | 0.001           |
| <i>Moderated Avg. Treatment Effect (DDD): Net Lay vs. HCP</i> | 0.0 (-1.0, 1.1)                    | 0.95            |
| <b>Social Factors Knowledge</b>                               |                                    |                 |
| Baseline, Layperson, Non-CA Control                           | 4.0 (3.3, 4.7)                     | <.001           |
| Baseline, Layperson, CA Control                               | 3.6 (3.1, 4.1)                     | <.001           |
| Baseline, Layperson, Intervention                             | 3.6 (3.1, 4.2)                     | <.001           |
| Baseline, HCP, Non-CA Control                                 | 4.3 (3.2, 5.4)                     | <.001           |
| Baseline, HCP, CA Control                                     | 4.4 (3.5, 5.3)                     | <.001           |
| Baseline, HCP, Intervention                                   | 4.8 (3.8, 5.8)                     | <.001           |
| Follow-up, Layperson, Non-CA Control                          | 3.9 (3.2, 4.5)                     | <.001           |
| Follow-up, Layperson, CA Control                              | 3.6 (3.1, 4.1)                     | <.001           |
| Follow-up, Layperson, Intervention                            | 6.5 (5.7, 7.3)                     | <.001           |
| Follow-up, HCP, Non-CA Control                                | 3.6 (2.7, 4.6)                     | <.001           |
| Follow-up, HCP, CA Control                                    | 4.6 (3.6, 5.5)                     | <.001           |
| Follow-up, HCP, Intervention                                  | 6.7 (5.4, 8.0)                     | <.001           |
| <i>Average Treatment Effect (DID): Laypersons</i>             | 2.9 (2.3, 3.5)                     | <.001           |
| <i>Average Treatment Effect (DID): HCP</i>                    | 1.7 (0.7, 2.7)                     | 0.001           |
| <i>Moderated Avg. Treatment Effect (DDD): Net Lay vs. HCP</i> | 1.2 (0.0, 2.4)                     | 0.04            |

\* Bonferroni corrected for multiple comparisons

eTable 7: Marginal estimates for trust and anxiety items by self-reported health care professional status (sensitivity analysis)

|                                                                                                              | Marginal Estimate (95% CI*)                                      | Wald Z   |
|--------------------------------------------------------------------------------------------------------------|------------------------------------------------------------------|----------|
|                                                                                                              | Likert Score                                                     | P-Value* |
| <b>"I trust that hospitals and doctors will apply policies like this in a fair and consistent way"</b>       | <b>Likert Scale (1: Strongly Disagree to 10: Strongly Agree)</b> |          |
| Baseline, Layperson, Non-CA Control                                                                          | 6.3 (5.6, 6.9)                                                   | <.001    |
| Baseline, Layperson, CA Control                                                                              | 6.1 (5.6, 6.6)                                                   | <.001    |
| Baseline, Layperson, Intervention                                                                            | 6.0 (5.5, 6.6)                                                   | <.001    |
| Baseline, HCP, Non-CA Control                                                                                | 5.9 (4.9, 6.9)                                                   | <.001    |
| Baseline, HCP, CA Control                                                                                    | 6.4 (5.6, 7.2)                                                   | <.001    |
| Baseline, HCP, Intervention                                                                                  | 6.3 (5.4, 7.1)                                                   | <.001    |
| Follow-up, Layperson, Non-CA Control                                                                         | 5.9 (5.2, 6.5)                                                   | <.001    |
| Follow-up, Layperson, CA Control                                                                             | 5.8 (5.3, 6.3)                                                   | <.001    |
| Follow-up, Layperson, Intervention                                                                           | 6.4 (5.8, 6.9)                                                   | <.001    |
| Follow-up, HCP, Non-CA Control                                                                               | 6.1 (5.1, 7.0)                                                   | <.001    |
| Follow-up, HCP, CA Control                                                                                   | 6.6 (5.8, 7.4)                                                   | <.001    |
| Follow-up, HCP, Intervention                                                                                 | 6.8 (6.0, 7.6)                                                   | <.001    |
| <i>Average Treatment Effect (DID): Laypersons</i>                                                            | 0.6 (0.1, 1.1)                                                   | 0.03     |
| <i>Average Treatment Effect (DID): HCP</i>                                                                   | 0.3 (-0.5, 1.2)                                                  | 0.41     |
| <i>Moderated Avg. Treatment Effect (DDD): Net Lay vs. HCP</i>                                                | 0.2 (-0.7, 1.2)                                                  | 0.62     |
| <b>"I trust hospitals and doctors to be honest and transparent about how resources are used in a crisis"</b> | <b>Likert Scale (1: Strongly Disagree to 10: Strongly Agree)</b> |          |
| Baseline, Layperson, Non-CA Control                                                                          | 6.1 (5.5, 6.8)                                                   | <.001    |
| Baseline, Layperson, CA Control                                                                              | 6.0 (5.5, 6.6)                                                   | <.001    |
| Baseline, Layperson, Intervention                                                                            | 6.1 (5.6, 6.7)                                                   | <.001    |
| Baseline, HCP, Non-CA Control                                                                                | 5.8 (4.8, 6.8)                                                   | <.001    |
| Baseline, HCP, CA Control                                                                                    | 6.4 (5.5, 7.2)                                                   | <.001    |
| Baseline, HCP, Intervention                                                                                  | 6.3 (5.4, 7.1)                                                   | <.001    |
| Follow-up, Layperson, Non-CA Control                                                                         | 5.5 (4.8, 6.2)                                                   | <.001    |
| Follow-up, Layperson, CA Control                                                                             | 5.4 (4.9, 5.9)                                                   | <.001    |
| Follow-up, Layperson, Intervention                                                                           | 6.3 (5.7, 6.8)                                                   | <.001    |
| Follow-up, HCP, Non-CA Control                                                                               | 5.8 (4.8, 6.8)                                                   | <.001    |
| Follow-up, HCP, CA Control                                                                                   | 6.4 (5.5, 7.2)                                                   | <.001    |
| Follow-up, HCP, Intervention                                                                                 | 6.8 (6.0, 7.7)                                                   | <.001    |
| <i>Average Treatment Effect (DID): Laypersons</i>                                                            | 0.8 (0.2, 1.3)                                                   | <.001    |
| <i>Average Treatment Effect (DID): HCP</i>                                                                   | 0.6 (-0.3, 1.4)                                                  | 0.19     |
| <i>Moderated Avg. Treatment Effect (DDD): Net Lay vs. HCP</i>                                                | 0.2 (-0.8, 1.2)                                                  | 0.71     |
| <b>"I feel anxious or worried when I think about policies like these"</b>                                    | <b>Likert Scale (1: Strongly Disagree to 10: Strongly Agree)</b> |          |
| Baseline, Layperson, Non-CA Control                                                                          | 6.2 (5.5, 6.9)                                                   | <.001    |
| Baseline, Layperson, CA Control                                                                              | 6.4 (5.9, 7.0)                                                   | <.001    |

|                                                               | <b>Marginal Estimate (95% CI*)</b> | <b>Wald Z</b>   |
|---------------------------------------------------------------|------------------------------------|-----------------|
|                                                               | <i>Likert Score</i>                | <i>P-Value*</i> |
| Baseline, Layperson, Intervention                             | 6.3 (5.7, 6.9)                     | <.001           |
| Baseline, HCP, Non-CA Control                                 | 6.5 (5.5, 7.6)                     | <.001           |
| Baseline, HCP, CA Control                                     | 6.3 (5.4, 7.2)                     | <.001           |
| Baseline, HCP, Intervention                                   | 6.5 (5.6, 7.5)                     | <.001           |
| Follow-up, Layperson, Non-CA Control                          | 6.8 (6.1, 7.5)                     | <.001           |
| Follow-up, Layperson, CA Control                              | 6.5 (5.9, 7.0)                     | <.001           |
| Follow-up, Layperson, Intervention                            | 6.3 (5.8, 6.9)                     | <.001           |
| Follow-up, HCP, Non-CA Control                                | 5.6 (4.5, 6.6)                     | <.001           |
| Follow-up, HCP, CA Control                                    | 6.3 (5.4, 7.1)                     | <.001           |
| Follow-up, HCP, Intervention                                  | 6.2 (5.3, 7.2)                     | <.001           |
| <i>Average Treatment Effect (DID): Laypersons</i>             | 0.0 (-0.5, 0.6)                    | 0.91            |
| <i>Average Treatment Effect (DID): HCP</i>                    | -0.2 (-1.1, 0.6)                   | 0.58            |
| <i>Moderated Avg. Treatment Effect (DDD): Net Lay vs. HCP</i> | 0.3 (-0.7, 1.3)                    | 0.60            |

\* Bonferroni corrected for multiple comparisons



eTable 8: Overall knowledge improvement treatment effect – stratified analyses by demographics

| Improvement in number of correct knowledge items (out of 20) |                  |      |            |        |      |
|--------------------------------------------------------------|------------------|------|------------|--------|------|
|                                                              | Treatment Effect | S.E. | P (Wald Z) | 95% CI |      |
| <b>Race/Ethnicity</b>                                        |                  |      |            |        |      |
| Asian/Pacific Islander, non-Hispanic                         | 6.9              | 1.1  | <.001      | 4.6    | 9.1  |
| Black, non-Hispanic                                          | 6.1              | 2.2  | 0.006      | 1.7    | 10.5 |
| Hispanic/Latin                                               | 5.3              | 1.2  | <.001      | 2.9    | 7.7  |
| Multiracial, non-Hispanic                                    | 6.8              | 3.7  | 0.07       | -0.4   | 13.9 |
| White, non-Hispanic                                          | 5.3              | 0.5  | <.001      | 4.4    | 6.3  |
| Other, non-Hispanic                                          | 9.8              | 5.0  | 0.05       | 0.03   | 19.5 |
| <b>Education</b>                                             |                  |      |            |        |      |
| Less than a bachelor's degree                                | 6.2              | 1.1  | <.001      | 4.0    | 8.4  |
| Bachelor's degree or higher                                  | 5.5              | 0.4  | <.001      | 4.7    | 6.4  |
| <b>Age</b>                                                   |                  |      |            |        |      |
| Under 35 years old                                           | 4.9              | 1.0  | <.001      | 2.9    | 6.8  |
| 35-55 years old                                              | 5.5              | 0.7  | <.001      | 4.2    | 6.8  |
| Older than 55 years old                                      | 5.9              | 0.6  | <.001      | 4.7    | 7.1  |

eTable 9: Trust and anxiety item treatment effect – stratified analyses by demographics. Questions on distress and moral objection were only asked of HCP and insufficiently powered for stratified analyses and are omitted here.

|                                      | <b>I trust that hospitals and doctors will apply policies like this in a fair and consistent way</b> |                | <b>I trust hospitals and doctors to be honest and transparent about how resources are used in a crisis</b> |                | <b>I feel anxious or worried when I think about policies like these</b> |                |
|--------------------------------------|------------------------------------------------------------------------------------------------------|----------------|------------------------------------------------------------------------------------------------------------|----------------|-------------------------------------------------------------------------|----------------|
|                                      | <i>Treatment Effect (95% CI)</i>                                                                     | <i>P-Value</i> | <i>Treatment Effect (95% CI)</i>                                                                           | <i>P-Value</i> | <i>Treatment Effect (95% CI)</i>                                        | <i>P-Value</i> |
| <b>Race/Ethnicity</b>                |                                                                                                      |                |                                                                                                            |                |                                                                         |                |
| Asian/Pacific Islander, non-Hispanic | 1.22 (0.06, 2.38)                                                                                    | 0.04           | 1.39 (0.17, 2.61)                                                                                          | 0.03           | 0.77 (-0.38, 1.92)                                                      | 0.19           |
| Black, non-Hispanic                  | 0.22 (-2.61, 3.07)                                                                                   | 0.87           | 1.22 (-1.81, 4.25)                                                                                         | 0.43           | -0.04 (-3.61, 3.52)                                                     | 0.98           |
| Hispanic/Latin                       | 0.60 (-0.80, 2.01)                                                                                   | 0.40           | 0.38 (-0.97, 1.74)                                                                                         | 0.58           | -0.70 (-3.38, 0.98)                                                     | 0.41           |
| Multiracial, non-Hispanic            | -0.62 (-2.80, 1.55)                                                                                  | 0.58           | -1.12 (-2.88, 0.64)                                                                                        | 0.21           | -1.01 (-3.57, 1.55)                                                     | 0.44           |
| White, non-Hispanic                  | 0.41 (-0.09, 0.91)                                                                                   | 0.11           | 0.74 (0.22, 1.25)                                                                                          | 0.005          | -0.08 (-0.61, 0.45)                                                     | 0.76           |
| Other, non-Hispanic                  | 1.75 (-1.72, 5.22)                                                                                   | 0.32           | -3.75 (-10.39, 2.89)                                                                                       | 0.27           | -0.50 (-1.97, 0.97)                                                     | 0.51           |
| <b>Education</b>                     |                                                                                                      |                |                                                                                                            |                |                                                                         |                |
| Less than a bachelor's degree        | 0.44 (-0.70, 1.58)                                                                                   | 0.45           | 0.21 (-1.18, 1.61)                                                                                         | 0.76           | -0.24 (-1.46, 0.97)                                                     | 0.69           |
| Bachelor's degree or higher          | 0.53 (0.08, 0.99)                                                                                    | 0.02           | 0.80 (0.34, 1.26)                                                                                          | 0.001          | -0.02 (-0.50, 0.47)                                                     | 0.95           |
| <b>Age</b>                           |                                                                                                      |                |                                                                                                            |                |                                                                         |                |
| Under 35 years old                   | 1.44 (0.50, 2.38)                                                                                    | 0.003          | 1.31 (0.41, 2.22)                                                                                          | 0.004          | -0.01 (-1.01, 0.99)                                                     | 0.99           |
| 35-55 years old                      | 0.16 (-0.52, 0.83)                                                                                   | 0.65           | 0.52 (-0.19, 1.22)                                                                                         | 0.15           | -0.32 (-0.98, 0.34)                                                     | 0.34           |
| Older than 55 years old              | 0.46 (-0.19, 1.11)                                                                                   | 0.17           | 0.67 (-0.03, 1.37)                                                                                         | 0.06           | 0.19 (-0.56, 0.94)                                                      | 0.62           |

eTable 10: Comparison of imputed and unimputed datasets on outcomes

|                                                                                                              | Dataset                          | DID Estimate | S.E.   | 95% CI |        | P-Value |
|--------------------------------------------------------------------------------------------------------------|----------------------------------|--------------|--------|--------|--------|---------|
| <b>Knowledge</b>                                                                                             |                                  |              |        |        |        |         |
| <b>Overall Knowledge</b>                                                                                     | Imputed                          | 5.642        | 0.405  | 4.849  | 6.435  | <.001   |
|                                                                                                              | Unimputed                        | 5.590        | 0.404  | 4.799  | 6.381  | <.001   |
|                                                                                                              | Difference:<br>Unimputed-Imputed | -0.052       | -0.001 | -0.049 | -0.054 | ---     |
| <b>Logistical Factors</b>                                                                                    | Imputed                          | 1.487        | 0.166  | 1.161  | 1.813  | <.001   |
|                                                                                                              | Unimputed                        | 1.487        | 0.166  | 1.161  | 1.813  | <.001   |
|                                                                                                              | Difference:<br>Unimputed-Imputed | 0.000        | 0.000  | 0.000  | 0.000  | ---     |
| <b>Health Factors</b>                                                                                        | Imputed                          | 1.521        | 0.241  | 1.049  | 1.993  | <.001   |
|                                                                                                              | Unimputed                        | 1.520        | 0.240  | 1.048  | 1.991  | <.001   |
|                                                                                                              | Difference:<br>Unimputed-Imputed | -0.002       | 0.000  | -0.001 | -0.002 | ---     |
| <b>Social Factors</b>                                                                                        | Imputed                          | 2.634        | 0.265  | 2.114  | 3.153  | <.001   |
|                                                                                                              | Unimputed                        | 2.584        | 0.264  | 2.067  | 3.101  | <.001   |
|                                                                                                              | Difference:<br>Unimputed-Imputed | -0.050       | -0.001 | -0.048 | -0.053 | ---     |
| <b>Trust &amp; Anxiety</b>                                                                                   |                                  |              |        |        |        |         |
| <b>"I trust that hospitals and doctors will apply policies like this in a fair and consistent way"</b>       | Imputed                          | 0.547        | 0.225  | 0.107  | 0.987  | 0.02    |
|                                                                                                              | Unimputed                        | 0.517        | 0.221  | 0.085  | 0.950  | <.001   |
|                                                                                                              | Difference:<br>Unimputed-Imputed | -0.030       | -0.004 | -0.023 | -0.037 | ---     |
| <b>"I trust hospitals and doctors to be honest and transparent about how resources are used in a crisis"</b> | Imputed                          | 0.729        | 0.236  | 0.267  | 1.191  | 0.002   |
|                                                                                                              | Unimputed                        | 0.720        | 0.233  | 0.263  | 1.177  | 0.002   |
|                                                                                                              | Difference:<br>Unimputed-Imputed | -0.009       | -0.003 | -0.003 | -0.014 | ---     |
| <b>"I feel anxious or worried when I think about policies like these"</b>                                    | Imputed                          | -0.018       | 0.239  | -0.486 | 0.451  | 0.94    |
|                                                                                                              | Unimputed                        | -0.045       | 0.237  | -0.509 | 0.419  | 0.85    |
|                                                                                                              | Difference:<br>Unimputed-Imputed | -0.027       | -0.002 | -0.023 | -0.032 | ---     |
| <b>"I feel like I would be distressed or uncomfortable if I had to carry out policies like these"</b>        | Imputed                          | -0.535       | 0.459  | -1.435 | 0.364  | 0.24    |
|                                                                                                              | Unimputed                        | -0.462       | 0.454  | -1.352 | 0.427  | 0.31    |
|                                                                                                              | Difference:<br>Unimputed-Imputed | 0.073        | -0.005 | 0.083  | 0.063  | ---     |
| <b>"I would have a moral objection to carrying out a policy like this"</b>                                   | Imputed                          | -0.430       | 0.560  | -1.528 | 0.669  | 0.44    |
|                                                                                                              | Unimputed                        | -0.377       | 0.566  | -1.487 | 0.732  | 0.51    |
|                                                                                                              | Difference:<br>Unimputed-Imputed | 0.052        | 0.006  | 0.041  | 0.063  | ---     |

\* Asked of HCP only
