# Supplementary material for: Promotion of Knowledge and Trust Surrounding Scarce Resource Allocation Policies: A Randomized Clinical Trial
Source: PubMed Central journal article supplement (PMC11489882; doi:10.1001/jamahealthforum.2024.3509), 2024-10-18
Supplement: jamahealthforum-e243509-s003.pdf [file jamahealthforum-e243509-s003.pdf]

## Data Sharing Statement

Buhr. Promotion of Knowledge and Trust Surrounding Scarce Resource Allocation Policies. *JAMA Health Forum*. Published October 18, 2024. doi:10.1001/jamahealthforum.2024.3509

### Data

**Additional Information:** ClinicalTrials.gov registration NCT04373135.

**Data available:** Yes

**Data types:** Deidentified participant data, Data dictionary

**How to access data:** Upon reasonable request to the investigators and execution of a data use agreement.

**When available:** With publication

### Supporting Documents

**Document types:** None

### Additional Information

**Who can access the data:** researchers whose proposed use of the data has been approved

**Types of analyses:** Additional analyses

**Mechanisms of data availability:** With investigator support after approval of a proposal and a signed data use agreement.
